# Supplementary material for: Autoreactive T cell receptors with shared germline-like α chains in type 1 diabetes
Source: PubMed Central journal article supplement (PMC8663791; doi:10.1172/jci.insight.151349), 2021-11-22

1 **Title: Autoreactive T cell receptors with shared germline-like alpha chains in type 1 diabetes**

2

3

4

## 5 Supplemental Methods

6

7       **Human subjects.** Whole blood and banked PBMC samples were obtained from HC and  
8 established T1D subjects with informed consent (Table I). HC were matched for age and sex to  
9 T1D patients and had no personal or family history of T1D. Some of the T1D and HC subjects (N  
10 = 3 each T1D and HC) were described in an earlier report (1). HC, T1D and most newT1D  
11 subjects had high-risk *DRB1\*0401* HLA class II alleles. Patient characteristics are summarized in  
12 Table I and in more detail in Table S1.

13

14       **Isolation of IAR T cells.** Peripheral blood was drawn by venous puncture using heparin  
15 as anti-coagulant. Peripheral blood mononuclear cells (PBMC) were isolated by Ficoll-Hypaque  
16 centrifugation and were used fresh or were banked. Information on whether frozen or fresh  
17 cells were used with each donor is provided in Table S1. For HC (N = 14 total samples), cells  
18 from 6 donors were used fresh, and cells from 8 frozen; for newT1D (N = 24 total samples), all  
19 were used frozen; and for T1D (N = 21 total samples), cells from 11 donors were used fresh, and  
20 cells from 10 frozen. Expanded IAR T cells from frozen and fresh samples did not differ in  
21 fractions of public versus private TCRs.

22       With a few exceptions, procedures for isolation of IAR T cells antigen (Figure S1) were  
23 essentially as described previously (1). Briefly, fresh or frozen PBMC were cultured in either 48  
24 well or 6 well plates at 10e6 cells/ml in RPM1 1640 supplemented with 10% commercial human  
25 serum (Gemini Bio Products, West Sacramento, CA), penicillin/streptomycin (100 U/ml, 100  
26 µg/ml), sodium pyruvate (1 mM), and L-glutamine (2 mM) and anti-CD40 antibody (Miltenyi  
27 Biotec, San Diego CA) at 37°C. Cells from HC and T1D subjects were stimulated for 14h with a  
28 pool of 28 islet antigen peptides (HLA *DRB1\*0401* restricted) at 1.7 µg/ml. Cells from newT1D  
29 subjects were cultured with a pool of 35 islet peptides (*HLA-DRB1\*0401/0301/DQ8* restricted  
30 pool) at 1.4 µg/ml to accommodate the minority of newT1D subjects who had *DRB1\*0301*  
31 alleles (Tables 1 and S2). As controls, cells were cultured in the presence of an equal volume of  
32 DMSO (negative control) or a mix of viral peptides (positive control) for 14h. Viral peptides  
33 included: influenza *MP* peptides amino acids 57–76 and amino acids 97–116

34 (KGILGFVFTLTPSERGLQR, VKLYRKLKREITFHGAKEIS); and overlapping peptides from the CMV  
35 *pp65* and *AdV5* hexon gene products (Miltenyi Biotec). PBMC were then stained with anti-  
36 CD154-phycoerythrin (PE) labeled antibody (Miltenyi Biotec) followed by anti-PE coupled  
37 magnetic beads (Miltenyi Biotec), and CD154+ cells were enriched by magnetic bead  
38 separation. Enriched cells were surface stained with the antibodies indicated in Table S4 and  
39 CD4+CD154+CD69+ cells (naïve and memory cells for newT1D samples, memory cells only for  
40 HC and T1D samples) were single cell sorted using a BD FACSAria flow cytometer with the  
41 gating scheme shown in Figure S1B. For each sample, the CD154+CD69+ gate in islet stimulated  
42 cells was set based on the DMSO treated control. One variation from our previous protocol was  
43 that we sorted cells directly into 96 well plates (Figure S1A) instead of microfluidic chips for  
44 most of these experiments. The stimulation conditions utilized did not result in detectable cell  
45 division during the culture period (1). Since regulatory T cells do not strongly up-regulate CD154  
46 under these experimental conditions (2), the isolated cells (Figure S1B) were predominantly  
47 effector T cells.

48

49 **Lentiviral constructs and viral production.** Oligonucleotides (Genscript, Piscataway, NJ)  
50 encoding codon-optimized expanded rearranged *TRAV* and *TRBV* sequences were cloned (1)  
51 into the lentiviral plasmid, pRLL-MND-GFP (3), which was kindly provided by Dr. David Rawlings  
52 (Addgene plasmid #36247). In some cases, *TRA* and *TRB* sequences were first cloned into the  
53 modified 'TCR flex' pMP71 retroviral backbone (kindly provided by Dr. Ton Schumacher)  
54 upstream of the murine *Trac* and *Trbc* genes (4). The cloned *TRAV-TRBV* open reading frame in  
55 pMP71 was transferred as a Not1 and SpeI restriction fragment in place of the green  
56 fluorescent protein (GFP) sequence in pRLL-MND-GFP (3). For lentivirus production, 293T (ATCC  
57 CRL -3216) packaging cells were plated into 10-cm dishes and grown to ~95% confluency. Cells  
58 were transfected with packaging, envelope, and transfer plasmids using Polyethylenimine (PEI).  
59 Viral-containing supernatants were collected at 48 hrs. The virus was precipitated with PEG-it  
60 (System Biosciences) and concentrated 100x. Viral titers were determined using Lenti-X GoStix  
61 Plus (Takara).

62

63           **Transduction of human CD4<sup>+</sup> T cells.** CD4<sup>+</sup> T cells (1e6) were isolated from human  
64 PBMC using magnetic beads (Miltenyi Biotech, San Diego, CA) and stimulated for 48 hrs in 24  
65 well plates with ImmunoCult™ human CD3/CD28 T cell activator in ImmunoCult™-XF T Cell  
66 Expansion Medium (STEMCELL Technologies, Vancouver, BC, Canada) supplemented with 100  
67 IU ml<sup>-1</sup> rhIL-2 and 5µg/ml of rhIL-7 and rhIL-15 (growth medium). For lentiviral transduction, 5-  
68 20 microliters of 100x virus added to activated CD4<sup>+</sup> T cells (0.2e6 in 150 microliters T cell  
69 expansion medium supplemented with 10µg/ml protamine sulfate). Cells were spin inoculated  
70 by centrifugation of culture plates for 30 minutes at 500g, then rested for 18 hrs at 37°C in fresh  
71 growth medium. After 3 days, transduction efficiency was determined by staining with a  
72 monoclonal antibody (mAb) targeting the murine *Trbc* chain (H57-597, allophycocyanin (APC)-  
73 labeled, BD Biosciences, San Jose, CA).

74  
75           **Antigen specific proliferation assays.** Peptide-induced proliferation was detected by  
76 CFSE dye dilution for transduced CD4<sup>+</sup> T cells (1, 5). KRN 7000 (Avanti Polar Lipids, Inc.,  
77 Alabama/USA) was used to trigger iNKT cell-like proliferation. Since autologous antigen  
78 presenting cells were not always available for these experiments, we instead used banked  
79 PBMC (irradiated) from an unrelated donor positive for *DRB1\*0401* (or *DRB1\*0301* and *DQ8*)  
80 class II molecules. In some cases, we also used the Priess lymphoblastoid cell line (*DRB1\*0401*,  
81 *\*0401*) as APC. Although these cells expressed *DRB1\*0401*, *\*0301*, and/or *DQ8*, they likely had  
82 other HLA mismatches with patient cells (MHC class I, etc.). To control for the confounding  
83 effects of alloantigen responses driven by HLA mismatched APC, we set gates on cells cultured  
84 with no peptide. We then compared responses of transduced T cells, which exhibit both islet  
85 peptide- and alloantigen-driven responses, with non-transduced cells, which exhibit only  
86 alloantigen responses. Since ~70% of cells are transduced and ~30% of cells in the cultures are  
87 not transduced, we also compared proliferation of both cell subsets in the same cultures by  
88 gating on anti-murine *Trbc* stained cells (reference (1); see also Figure. S4). We typically  
89 observed minimal proliferation in either transduced or un-transduced T cells in the absence of  
90 peptide, indicating that alloreactivity was not a major concern under these conditions. Although  
91 the numbers of public TCRs for which we determined specificity was small, we noted no

92 significant differences with private TCRs in no peptide control values. Indicator CD4+ T cells  
93 were labeled with 5(6)-Carboxyfluorescein diacetate N-succinimidyl ester (CFSE). PBMCs  
94 isolated from a healthy HLADRB1 0401/0301 individual were used as antigen presenting cells  
95 and were loaded with antigenic peptides, which unless otherwise stated, were added to a final  
96 concentration of 5 µg/ml. CFSE-labeled CD4+ T cells (1e4) were mixed with 4e4 irradiated  
97 antigen presenting cells and then cultured for up to 5 days at 37°C in a 5% CO2 incubator.  
98 Finally, cells were stained with anti- human CD4+ (Clone RPA-T4, phycoerythrin-labeled,  
99 BioLegend, San Diego CA), and the murine Trbc chain (H57-597, allophycocyanin (APC)-labeled,  
100 BD Biosciences, San Jose, CA) to identify transduced cells. (1). CFSE intensities in different cell  
101 populations were then measured by flow cytometry and quantified by gating on the murine  
102 TCR<sup>+</sup> or TCR<sup>-</sup> populations in the CD4<sup>+</sup> parent population.

103

104 **EC50 determinations.** EC50 concentrations were determined using Bayesian curve  
105 fitting. Growth was assumed to follow the logistic curve defined as

106 
$$y = \frac{2H}{1 + e^{\frac{2D(M-x)}{H}}}$$

107 where M is the EC50 value, H is the height of the curve at EC50, and D is the slope of the curve  
108 at EC50. We fit Bayesian hierarchical growth curve models to the data using Stan, a C++ library  
109 for Bayesian inference (6), in R using the *cmdstanr* interface (7). The posterior distributions of  
110 the parameters were simulated using MCMC sampling 4 chains each with 7,000 post-warmup  
111 iterations. Point estimates for EC50 values use the median of the posterior distributions.

112 **Cell capture, scRNA-seq and TCR clonotype identification.** The frequencies of IAR CD4<sup>+</sup>  
113 memory T cells are low, especially in frozen PBMCs (a median of ~49 cells per sort (72 sorts)  
114 were recovered in our experiments). A major advance from our previous work (1) was  
115 development of the capability to sort islet- antigen reactive T cells directly into 96 well plates,  
116 which increased the cell capture yield, and resulted in better quality libraries. In agreement  
117 with our previous studies (1), we did not observe consistent differences in the numbers of cells  
118 captured nor the number of high quality libraries recovered between HC, newT1D and T1D  
119 subjects. After capture, cells were processed into libraries which were sequenced on a

120 HiSeq2500 sequencer (Illumina, San Diego, CA) using primarily 58 bp single-read dual-indexed  
121 reads (1). Methods for RNA-seq pipeline analysis and TCR clonotype identification were  
122 essentially as described previously (1, 8), except that we used the *MiXCR* (9) software package  
123 to identify productive TCR chain rearrangements. Here we employ the IMGT (10) convention of  
124 using junction to refer to the amino acid sequence starting with the 2nd cysteine residue  
125 encoded in the V gene and ending with the phenylalanine or typtophan residue in the J gene.  
126 Quality control filtering metrics included: the presence of an in-frame rearranged TCR chain,  
127 shown previously to correlate well with more extensive quality metrics (1); TCR junction length  
128 <30 amino acids; *TRAV* or *TRBV*, but not *TRDV* or *TRGV*, gene usage; and two or fewer *TRA*  
129 chains and two or fewer *TRB* chains. These TCRs are listed in Table S3 (total TCRs). For analyses,  
130 we additionally filtered out iNKT-like TCRs and TCRs from non-memory cells (CD45RA index  
131 marker positive). TCRs retained after quality control and filtering are denoted in Table S3  
132 (filtered TCRs). For some analyses, public and private TCRs were retained after additional  
133 filtering for type of junction sharing, also denoted in Table S3 (public/private TCRs).

134

135 ***tcrGraph***. We created the *tcrGraph* package in the R statistical computing language to  
136 implement a *tcrGraph* S3 class and provide utility functions for graph construction, data  
137 visualization, clone counting, and conversion to graph formats for other popular analysis  
138 packages such as *igraph*. Code is provided at <https://github.com/BenaroyaResearch/tcrGraph>.

139

140 **Sequence comparisons**. Pairwise Levenshtein distances between peptide sequences  
141 were calculated using the *stringdist* software package. For calculating the significance of a test  
142 set of Levenshtein distances between *TRB* junctions, we devised a permutation testing  
143 procedure. We first took all unique *TRB* junctions in our data set (Table S3) and removed  
144 expanded public and private junctions. We next selected a random subset of these *TRB*  
145 junctions of equal size to the original test set, then calculated pairwise Levenshtein distances  
146 between the random junctions. We then calculated differences in the distributions of  
147 Levenshtein distances for the test set versus the random set using Kolmogorov–Smirnov (KS  
148 test) tests. We repeated this process 1,000 times to generate a distribution of KS test *p*-values.

149 Finally, we determined overall significance as the median KS test p-value for differences  
150 between the test set versus random sets.

151

152 **Statistics.** Statistical tests were performed using the R programming language and  
153 software environment. For continuous, normally distributed variables, we utilized t-tests; for  
154 non-normally distributed variables, Wilcoxon signed rank tests; and for categorical variables,  
155 Fisher’s exact test. Unless otherwise noted, two-sided tests were performed. Where  
156 appropriate, multiple testing corrections were made (11). The term “significant” is reserved for  
157 p-values or false-discovery rates (FDR) of <0.05. The specific test used to derive each p-value is  
158 listed in the Figure legend. Hypergeometric p-values were calculated using the *phyper* function  
159 in R. Simpsons diversity was calculated as described (12). Where indicated, asterisks were used  
160 to indicate the significance level of p-values (or FDRs): \*\*\*\*\*, <1e-5; \*\*\*\*, <1e-4; \*\*\*, <1e-3;  
161 \*\*, <1e-2; and \*, <5e-2.

162

163

164

165 **References**

- 166 1. Cerosaletti K et al. Single-Cell RNA Sequencing Reveals Expanded Clones of Islet Antigen-  
167 Reactive CD4(+) T Cells in Peripheral Blood of Subjects with Type 1 Diabetes. *J. Immunol. Baltim.*  
168 *Md 1950* [published online ahead of print: May 31, 2017]; doi:10.4049/jimmunol.1700172
- 169 2. Schoenbrunn A et al. A converse 4-1BB and CD40 ligand expression pattern delineates  
170 activated regulatory T cells (Treg) and conventional T cells enabling direct isolation of  
171 alloantigen-reactive natural Foxp3+ Treg. *J. Immunol. Baltim. Md 1950* 2012;189(12):5985–  
172 5994.
- 173 3. Astrakhan A et al. Ubiquitous high-level gene expression in hematopoietic lineages provides  
174 effective lentiviral gene therapy of murine Wiskott-Aldrich syndrome. *Blood*  
175 2012;119(19):4395–4407.
- 176 4. Linnemann C et al. High-throughput identification of antigen-specific TCRs by TCR gene  
177 capture. *Nat. Med.* 2013;19(11):1534–1541.
- 178 5. Lyons AB, Parish CR. Determination of lymphocyte division by flow cytometry. *J. Immunol.*  
179 *Methods* 1994;171(1):131–137.
- 180 6. Stan Development Team. *Stan Modeling Language Users Guide and Reference Manual*  
181 *[Internet]*
- 182 7. Gabry, J, Cesnovar, R. *cmdstanr: R Interface to “CmdStan” [Internet]*. 2020:



- 183 8. Long, S.A., et al. Partial exhaustion of CD8 T cells and clinical response to teplizumab in new-  
184 onset type 1 diabetes. *Sci. Immunol.* 2016;1(eaai7793):1–9.
- 185 9. Bolotin DA et al. MiXCR: software for comprehensive adaptive immunity profiling. *Nat.*  
186 *Methods* 2015;12(5):380–381.
- 187 10. Alamyar E, Duroux P, Lefranc M-P, Giudicelli V. IMGT(®) tools for the nucleotide analysis of  
188 immunoglobulin (IG) and T cell receptor (TR) V-(D)-J repertoires, polymorphisms, and IG  
189 mutations: IMGT/V-QUEST and IMGT/HighV-QUEST for NGS. *Methods Mol. Biol. Clifton NJ*  
190 2012;882:569–604.
- 191 11. Hochberg Y, Benjamini Y. More powerful procedures for multiple significance testing. *Stat.*  
192 *Med.* 1990;9(7):811–818.
- 193 12. Jost L. Entropy and diversity. *Oikos* 2006;113(2):363–375.

194  
195

**Title: Autoreactive T cell receptors with shared germline-like alpha chains in type 1 diabetes**

## **Supplemental Tables**

**Table S1. Subject characteristics.**

**Table S2. Islet antigen peptides used for T cell stimulation.**

**Table S3. TCR sequences from single cell RNA-seq experiments**

**Table S4. Antibodies used for flow cytometric isolation of IAR T cells**



**Figure S2. Epitope specificities of individual TCRs identified by scRNA-seq in HC and T1D subjects.** Individual TCRs were re-expressed by lentiviral transduction, and islet peptide specificity was determined by proliferation assays. Shown are islet epitopes recognized by TCRs isolated from combined newT1D and T1D (red), or HC subjects (cyan). Each TCR with a given specificity is represented by a box. Other, TCRs that did not trigger proliferation in response to a unique islet peptide epitope, or were classified as bystander (i.e., iNKT-like TCR, Clone\_197).

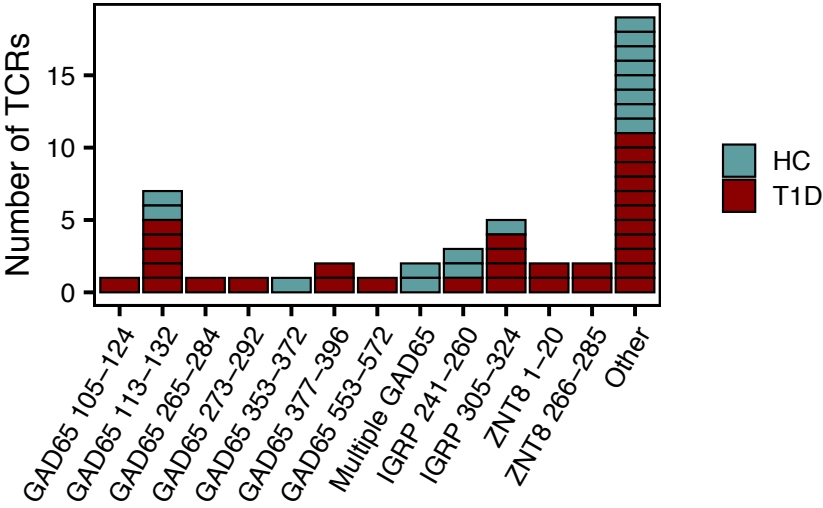

**Figure S3. Dose response curves for selected islet antigen reactive TCRs.** Shown are results of dye dilution assays to determine the EC50s of expanded islet reactive TCRs isolated from HC, newT1D and T1D subjects. Lentiviral-transduced TCR CD4 T cells were labeled with CFSE and stimulated with varying concentrations of the indicated islet antigen peptides for 5 days. Dye dilution was analyzed by flow cytometry and is reported as the percent of proliferated cells above the no peptide control for the same TCR. Each graph represents an individual islet reactive TCR (n=23), with an HA reactive TCR as a positive control (lower right). EC50 values are reported as  $\mu\text{g/ml}$ .

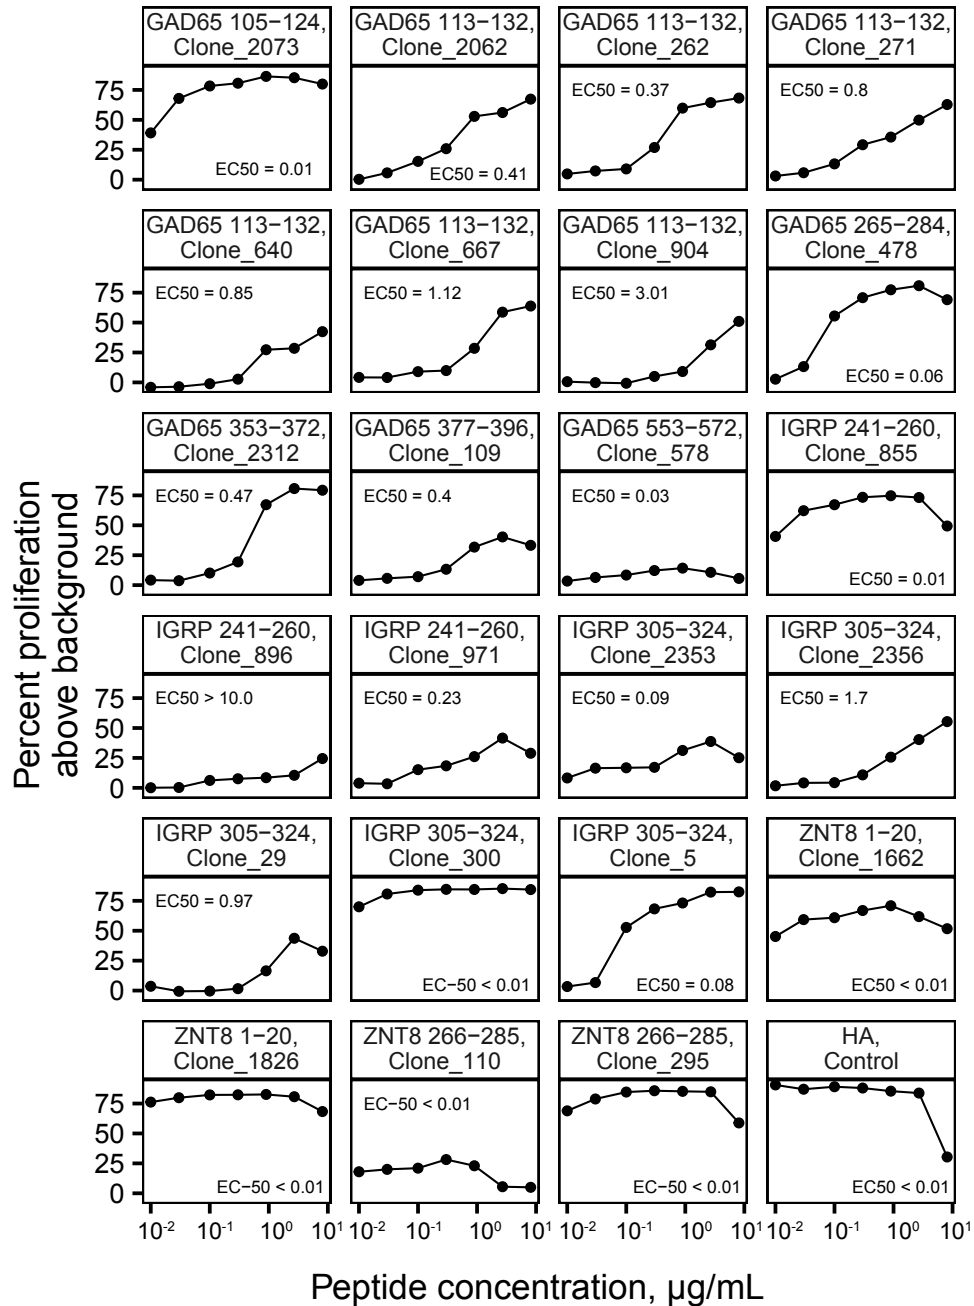

**Figure S4. Specificity of an iNKT-like TCR for galactosylceramide, not islet peptides.** Shown are results of dye dilution assays of CD4 T cells transduced with an iNKT-like TCR (Clone\_197) found in T1D subjects (Table S3). Transduced CD4 T cells were labeled with CFSE and stimulated with the indicated islet peptides or galactosylceramide (KRN 7000) for 5 days, then analyzed by flow cytometry. Cyan, non-transduced cells that did not express the murine *Trbc* protein (murine *Trbc*<sup>-</sup>); magenta, transduced cells that expressed the murine *Trbc* protein (murine *Trbc*<sup>+</sup>).

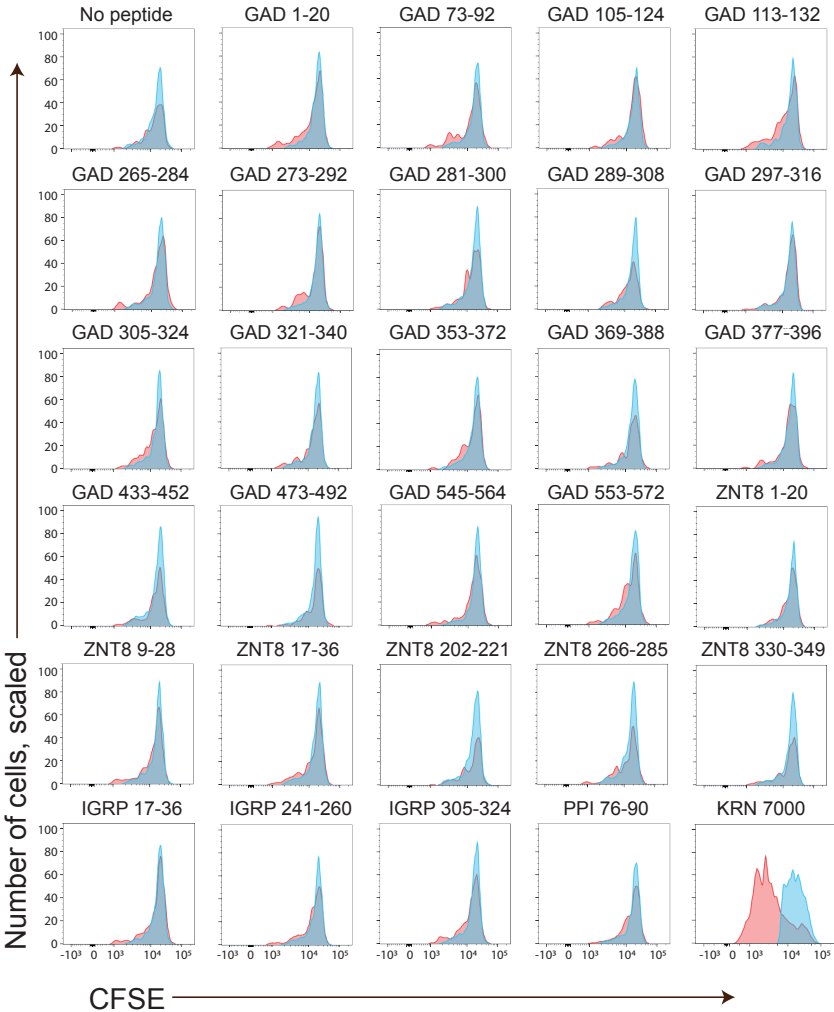

**Figure S5. Clonal diversity and persistence of expanded TCRs.** Simpson's diversity of TCRs from different disease groups. Filtered junctions (combined *TRA* and *TRB*) from HC, newT1D and T1D subjects (Table S3) (N = 808, 1,784 and 1,481, respectively) were iteratively downsampled to represent 30 cells from each subject prior to calculation of Simpson's diversity. Each symbol represents the median of 1000 iterative downsamples per individual subject. The significance of differences between groups was determined using Wilcoxon signed rank tests. None of the comparisons yielded significant FDR values. Similar results were obtained using individual *TRA* and *TRB* chains.

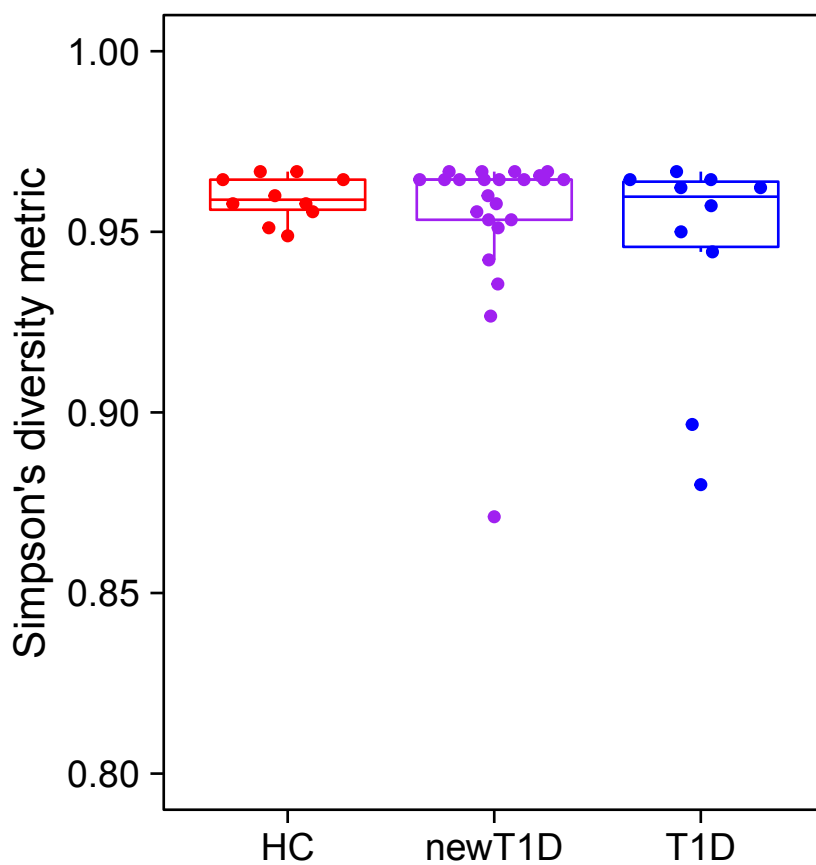



**Figure S6. Network graphs show the community landscape of private and public TCRs calculated by *tcrGraph*.** Network graphs of public (N = 270) and private (N = 1,130) junctions (Table S3, public/private TCRs) were made using the “stress” layout option of *tcrGraph*. Each graph shows edges (lines) linking nodes (circles) of associated *TRA* (blue) and *TRB* (green) junctions. Node size is proportional to the number of cells containing a particular TCR chain, as indicated in the scale to the right. **A) Private TCRs. B) Public TCRs.**

**A** Privately-Expanded Clones

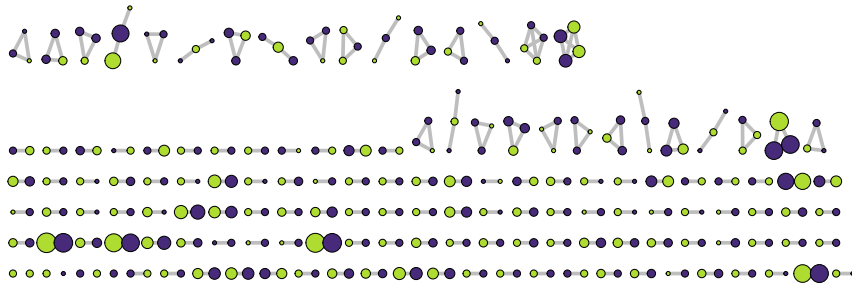

Chain  
 ● TRA  
 ● TRB

Number of Cells  
 ○ 5  
 ○ 10  
 ○ 15  
 ○ 20  
 ○ 25

**B** Publicly-Shared Clones

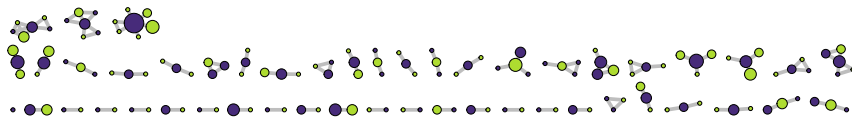

**Figure S7. Public TCRs are more likely to have multiple distinct *TRB* junctions sharing an identical *TRA* chain.** Shown is a compilation of the predominant combinations of distinct *TRB* and *TRA* junctions identified by *tcrGraph* in public and private TCR clones from network graphs shown in Figure S6.

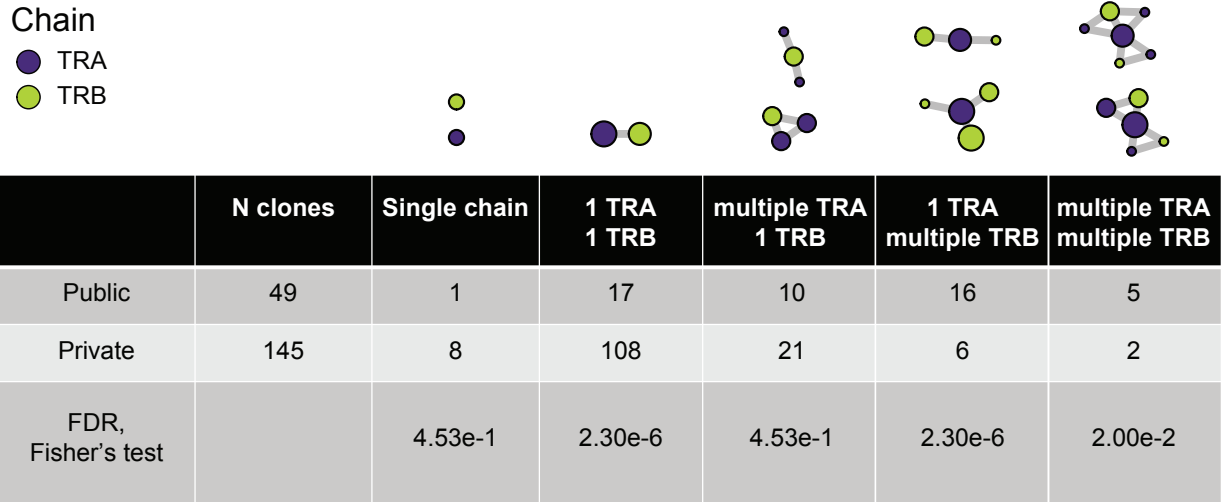

**Figure S8. Public *TRB* junctions did not share more unique *TRA* junctions than private *TRB* junctions.** Numbers of *TRA* junctions paired with unique public and private *TRB* junctions were calculated (N = 78 and 147 unique public and private *TRB* junctions, respectively) (Table S3, public/private TCRs). **A)** Combinations of unique *TRB* junctions associated with *TRA* junctions identified by *tcrGraph*. **B)** Tabulation of numbers of *TRA* junctions associated with each unique *TRB* junction. The significance of one versus multiple *TRA* junctions per *TRB* junction in public and private TCRs was assessed by Fisher's exact test. NS,  $p$ -value >0.05.

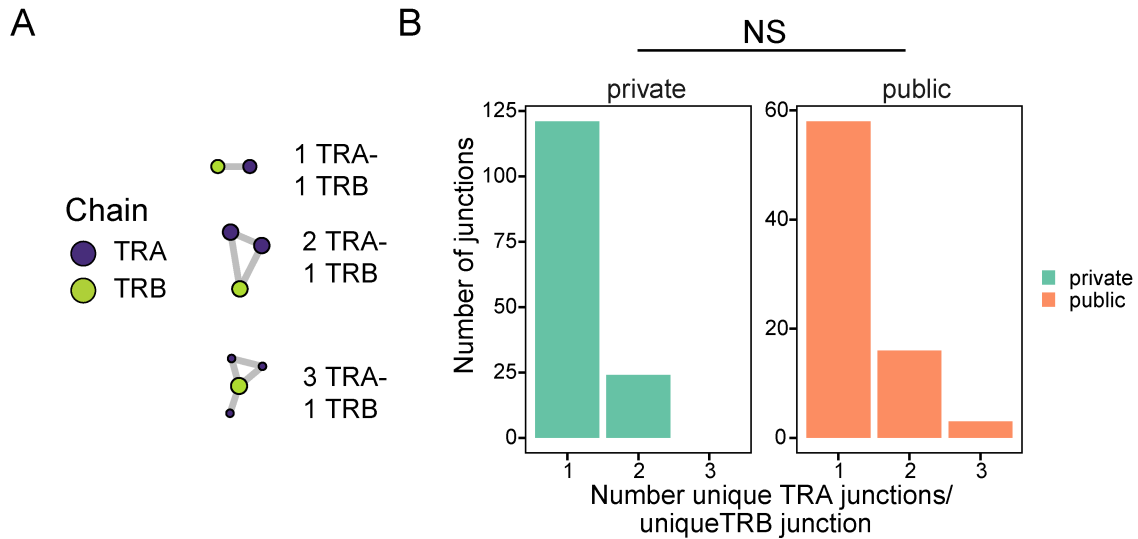

Supplement: jciinsight-6-151349-s018.pdf [file jciinsight-6-151349-s018.pdf]
